# Supplementary material for: Social determinants of multimorbidity patterns: A systematic review
Source: Front Public Health. 2023 Mar 27;11:1081518. doi: 10.3389/fpubh.2023.1081518 (PMC10084932; doi:10.3389/fpubh.2023.1081518)
Supplement: Supplementary file 2 [file Table_2.XLSX]

## Sheet: Axis Tool 
Title	YEAR	Autor	DOI	Q1	Q2	Q3	Q4	Q5	Q6	Q7	Q8	Q9	Q10	Q11	Q12	Q13	Q14	Q15	Q16	Q17	Q18	Q19	Q20	COMMENT/DONT KNOW	YES	NO	FINAL DECISION
A cluster-based approach for integrating clinical management of Medicare beneficiaries with multiple chronic conditions.	2019	Egan, Brent M.; Sutherland, Susan E.; Tilkemeier, Peter L.; Davis, Robert A.; Rutledge, Valinda; Sinopoli, Angelo	10.1371/journal.pone.0217696	Yes	Yes	No	Yes	Yes	Yes	Don't Know/Comment	Yes	Yes	Yes	Yes	Yes	Don't Know/Comment	Don't Know/Comment	Yes	Yes	Yes	Yes	No	Yes		15	2	YES
A Latent Class Analysis of Multimorbidity and the Relationship to Socio-Demographic Factors and Health-Related Quality of Life. A National Population-Based Study of 162,283 Danish Adults.	2017	Larsen, Finn Breinholt; Pedersen, Marie Hauge; Friis, Karina; Glümer, Charlotte; Lasgaard, Mathias	10.1371/journal.pone.0169426	Yes	Yes	Yes	Yes	Yes	Yes	No	Yes	Yes	Yes	Yes	Yes	Yes	No	Yes	Yes	Yes	Yes	No	Yes		17	3	YES
Age density patterns in patients medical conditions: A clustering approach	2018	Alhasoun F, Aleissa F, Alhazzani M, Moyano LG, Pinhanez C, González MC.	10.1371/journal.pcbi.1006115	Yes	Yes	Yes	Yes	Yes	Yes	Don't Know/Comment	Yes	Yes	Yes	Yes	Yes	Don't Know/Comment	Don't Know/Comment	Yes	Yes	Yes	No	No	Yes		15	2	YES
Analysis of multimorbidity networks associated with different factors in Northeast China: a cross-sectional analysis	2021	Yu J, Li Y, Zheng Z, Jia H, Cao P, Qiangba Y, Yu X.	10.1136/bmjopen-2021-051050	Yes	Yes	Yes	Yes	Yes	Yes	Don't Know/Comment	Yes	Yes	Yes	Yes	Yes	Don't Know/Comment	Don't Know/Comment	Yes	Yes	Yes	Yes	No	Yes		16	1	YES
Bayesian networks to identify potential high-risk multimorbidity and intervention clusters in inpatients: an explorative data mining study	2020	Roth, JA; Thomas, S; Martin, G; Hug, BL; PATREC Study Grp	10.44147/SMW.2020.20299	Yes	Yes	Yes	Yes	Yes	Yes	Yes	Yes	Yes	Yes	Yes	Yes	No	Yes	Yes	Yes	Yes	Yes	No	Yes		18	2	YES
Burden of multimorbidity in relation to age, gender and immigrant status: a cross-sectional study based on administrative data	2016	Lenzi J, Avaldi VM, Rucci P, Pieri G, Fantini MP.	10.1136/bmjopen-2016-012812	Yes	Yes	Yes	Yes	Yes	Yes	Don't Know/Comment	Yes	Yes	Yes	Yes	Yes	Don't Know/Comment	Don't Know/Comment	Yes	Yes	Yes	Yes	No	Yes		16	1	YES
Characteristics, service use and mortality of clusters of multimorbid patients in England: a population-based study	2020	Zhu Y, Edwards D, Mant J, Payne RA, Kiddle S.	10.1186/s12916-020-01543-8	Yes	Yes	Yes	Yes	Yes	Yes	Don't Know/Comment	Yes	Yes	Yes	Yes	Yes	Don't Know/Comment	Don't Know/Comment	Yes	Yes	Yes	Yes	No	Yes		16	1	YES
Chronic condition patterns in the US population and their association with health related quality of life	2020	Zheng DD, McCollister KE, Christ SL, Lam BL, Feaster DJ, Lee DJ.	10.1016/j.ypmed.2020.106102	Yes	Yes	Yes	Yes	Yes	Yes	Don't Know/Comment	Yes	Yes	Yes	Yes	Yes	Don't Know/Comment	Don't Know/Comment	Yes	Yes	Yes	Yes	No	Yes		16	1	YES
Clustering of 27,525,663 death records from the united states based on health conditions associated with death: An example of big health data exploration	2019	Janssen, D.J.A., Rechberger, S., Wouters, E.F.M., Schols, J.M.G.A., Johnson, M.J., Currow, D.C., Curtis, J.R., Spruit, M.A.	10.3390/jcm8070922	Yes	Yes	Yes	Yes	Yes	Yes	Don't Know/Comment	Yes	Yes	Yes	Yes	Yes	Don't Know/Comment	Don't Know/Comment	Yes	Yes	Yes	Yes	No	No		15	2	YES
Clustering of Mental and Physical Comorbidity and the Risk of Frailty in Patients Aged 60 Years or More in Primary Care	2019	Bekić S, Babič F, Filipčić I, Trtica Majnarić L.	10.12659/MSM.915063	Yes	Yes	Yes	Yes	No	No	Don't Know/Comment	Yes	Yes	Yes	Yes	Yes	No	Yes	Yes	Yes	Yes	Yes	No	Yes		15	4	YES
Clusters of Multiple Complex Chronic Conditions: A Latent Class Analysis of Children at End of Life	2016	Lindley, L.C., Mack, J.W., Bruce, D.J.	10.1016/j.jpainsymman.2015.12.310	Yes	Yes	Yes	Yes	Yes	Yes	Don't Know/Comment	Yes	Yes	Yes	Yes	Yes	Don't Know/Comment	Don't Know/Comment	Yes	Yes	Yes	Yes	No	No		15	2	YES
Comorbidity patterns and socioeconomic inequalities in children under 15 with medical complexity: a population-based study.	2020	Carrilero, Neus; Dalmau-Bueno, Albert; García-Altés, Anna	10.1186/s12887-020-02253-z	Yes	Yes	Yes	Yes	Yes	Yes	Don't Know/Comment	Yes	Yes	Yes	Yes	Yes	No	Don't Know/Comment	Yes	Yes	Yes	Yes	No	Yes		16	2	YES
Comorbidity profile of mental disorders among adolescents: A latent class analysis	2019	Essau CA, de la Torre-Luque A.	10.1016/j.psychres.2019.06.007	Yes	Yes	Yes	Yes	Yes	Yes	Don't Know/Comment	Yes	Yes	Yes	Yes	Yes	Don't Know/Comment	Don't Know/Comment	Yes	Yes	Yes	Yes	No	Yes		16	1	YES
Comorbidity Profiles Identified in Older Primary Care Patients Who Attempt Suicide	2019	Morin RT, Li Y, Mackin RS, Whooley MA, Conwell Y, Byers AL.	10.1111/jgs.16126	Yes	Yes	Yes	Yes	Yes	Yes	Don't Know/Comment	Yes	Yes	Yes	Yes	Yes	Don't Know/Comment	Don't Know/Comment	Yes	Yes	Yes	Yes	No	Yes		16	1	YES
Comparative analysis of methods for identifying multimorbidity patterns: a study of 'real-world' data	2018	Roso-Llorach A, Violán C, Foguet-Boreu Q, Rodriguez-Blanco T, Pons-Vigués M, Pujol-Ribera E, Valderas JM.	10.1136/bmjopen-2017-018986	Yes	Yes	Yes	Yes	Yes	Yes	Don't Know/Comment	Yes	Yes	Yes	Yes	Yes	Don't Know/Comment	Don't Know/Comment	Yes	Yes	Yes	Yes	No	Yes		16	1	YES
Comparing Multimorbidity Patterns Among Discharged Middle-Aged and Older Inpatients Between Hong Kong and Zurich: A Hierarchical Agglomerative Clustering Analysis of Routine Hospital Records	2021	Lai, F.T.T., Beeler, P.E., Yip, B.H.K., Cheetham, M., Chau, P.Y.K., Chung, R.Y., Wong, E.L.Y., Yeoh, E.-K., Battegay, E., Wong, S.Y.S.	10.3389/fmed.2021.651925	Yes	Yes	Yes	Yes	Yes	Yes	Don't Know/Comment	Yes	Yes	Yes	Yes	Yes	Don't Know/Comment	Don't Know/Comment	Yes	Yes	Yes	Yes	No	Yes		16	1	YES
Comparisons of disease cluster patterns, prevalence and health factors in the USA, Canada, England and Ireland.	2021	Hernández, Belinda; Voll, Stacey; Lewis, Nathan A.; McCrory, Cathal; White, Arthur; Stirland, Lucy; Kenny, Rose Anne; Reilly, Richard; Hutton, Craig P.; Griffith, Lauren E.; Kirkland, Susan A.; Terrera, Graciela Muniz; Hofer, Scott M.	10.1186/s12889-021-11706-8	Yes	Yes	Yes	Yes	Yes	Yes	Don't Know/Comment	Yes	Yes	Yes	Yes	Yes	Don't Know/Comment	Don't Know/Comment	Yes	Yes	Yes	Yes	No	Yes		16	1	YES
Complex comorbidity clusters in OEF/OIF veterans: the polytrauma clinical triad and beyond	2014	Pugh MJ, Finley EP, Copeland LA, Wang CP, Noel PH, Amuan ME, Parsons HM, Wells M, Elizondo B, Pugh JA.	10.1097/MLR.0000000000000059	Yes	Yes	Yes	Yes	Yes	Yes	Don't Know/Comment	Yes	Yes	Yes	Yes	Yes	Don't Know/Comment	Don't Know/Comment	Yes	Yes	Yes	Yes	No	Yes		16	1	YES
Contextual and individual inequalities of multimorbidity in Brazilian adults: a cross-sectional national-based study.	2017	Nunes, Bruno P.; Chiavegatto Filho, Alexandre D. P.; Pati, Sanghamitra; Cruz Teixeira, Doralice S.; Flores, Thaynã R.; Camargo-Figuera, Fabio A.; Munhoz, Tiago N.; Thumé, Elaine; Facchini, Luiz A.; Rodrigues Batista, Sandro R.	10.1136/bmjopen-2017-015885	Yes	Yes	No	Yes	Don't Know/Comment	Don't Know/Comment	Don't Know/Comment	Yes	Yes	Yes	Yes	No	Don't Know/Comment	Don't Know/Comment	Yes	Yes	Yes	Yes	No	Yes		12	3	YES
Deconstructing Complex Multimorbidity in the Very Old: Findings from the Newcastle 85+ Study	2016	Collerton J, Jagger C, Yadegarfar ME, Davies K, Parker SG, Robinson L, Kirkwood TB.	10.1155/2016/8745670	Yes	Yes	Yes	Yes	Yes	Yes	Don't Know/Comment	Yes	Yes	Yes	Yes	Yes	Don't Know/Comment	Don't Know/Comment	Yes	Yes	Yes	Yes	Yes	Yes		17	0	YES
Description of multimorbidity clusters of admitted patients in medical departments of a general hospital	2021	Matesanz-Fernández, M., Seoane-Pillado, T., Iñiguez-Vázquez, I., Suárez-Gil, R., Pértega-Díaz, S., Casariego-Vales, E.	10.1136/postgradmedj-2020-139361	Yes	Yes	Yes	Yes	Yes	Yes	Don't Know/Comment	Yes	Yes	Yes	Yes	Yes	Don't Know/Comment	Don't Know/Comment	Yes	Yes	Yes	Yes	No	Yes		16	1	YES
Differences in Clinical Outcomes of Adults Referred to a Homeless Transitional Care Program Based on Multimorbid Health Profiles: A Latent Class Analysis	2021	Smith, C.M., Feigal, J., Sloane, R., Biederman, D.J.	10.3389/fpsyt.2021.780366	Yes	Yes	Yes	Yes	Yes	Yes	Don't Know/Comment	Yes	Yes	Yes	Yes	Yes	Don't Know/Comment	Don't Know/Comment	Yes	Yes	Yes	Yes	No	Yes		16	1	YES
Differences in psychiatric comorbidities and gender distribution among three clusters of personality disorders: A nationwide population-based study	2021	Hsu, C.-W., Wang, L.-J., Lin, P.-Y., Hung, C.-F., Yang, Y.-H., Chen, Y.-M., Kao, H.-Y.	10.3390/jcm10153294	Yes	Yes	Yes	Yes	Yes	Yes	Don't Know/Comment	Yes	Yes	Yes	Yes	Yes	Don't Know/Comment	Don't Know/Comment	Yes	Yes	Yes	Yes	No	Yes		16	1	YES
Disability, quality of life and all-cause mortality in older Mexican adults: association with multimorbidity and frailty	2018	Rivera-Almaraz A, Manrique-Espinoza B, Ávila-Funes JA, Chatterji S, Naidoo N, Kowal P, Salinas-Rodríguez A.	10.1186/s12877-018-0928-7	Yes	Yes	Yes	Yes	Yes	Yes	Don't Know/Comment	Yes	Yes	Yes	Yes	Yes	Don't Know/Comment	Don't Know/Comment	Yes	Yes	Yes	Yes	No	Yes		16	1	YES
Effect of Multimorbidity on Health-Related Quality of Life in Adults Aged 55 Years or Older: Results from the SU.VI.MAX 2 Cohort	2016	Walker V, Perret-Guillaume C, Kesse-Guyot E, Agrinier N, Hercberg S, Galan P, Assmann KE, Briançon S, Rotonda C.	10.1371/journal.pone.0169282	Yes	Yes	Yes	Yes	Yes	Yes	Don't Know/Comment	Yes	Yes	Yes	Yes	Yes	Don't Know/Comment	Don't Know/Comment	Yes	Yes	Yes	Yes	No	Yes		16	1	YES
Ethnic and geographic variations in multimorbidty: Evidence from three large cohorts.	2018	Gebregziabher, Mulugeta; Ward, Ralph C.; Taber, David J.; Walker, Rebekah J.; Ozieh, Mukoso; Dismuke, Clara E.; Axon, Robert N.; Egede, Leonard E.	10.1016/j.socscimed.2018.06.020	Yes	Yes	Yes	Yes	Yes	Yes	Don't Know/Comment	Yes	Yes	Yes	Yes	Yes	Don't Know/Comment	Don't Know/Comment	Yes	Yes	Yes	Yes	No	Yes		16	1	YES
Ethnicity and psychiatric comorbidity in a national sample: evidence for latent comorbidity factor invariance and connections with disorder prevalence.	2013	Eaton, Nicholas R.; Keyes, Katherine M.; Krueger, Robert F.; Noordhof, Arjen; Skodol, Andrew E.; Markon, Kristian E.; Grant, Bridget F.; Hasin, Deborah S.	10.1007/s00127-012-0595-5	Yes	Yes	Yes	Yes	Yes	Yes	Don't Know/Comment	Yes	Yes	Yes	Yes	Yes	Don't Know/Comment	Don't Know/Comment	Yes	Yes	Yes	Yes	No	Yes		16	1	YES
Examining health disparities by gender: A multimorbidity network analysis of electronic medical record.	2017	Kalgotra, Pankush; Sharda, Ramesh; Croff, Julie M.	10.1016/j.ijmedinf.2017.09.014	No	Yes	Yes	Yes	Yes	Yes	Don't Know/Comment	Yes	Yes	Yes	Yes	Yes	Don't Know/Comment	Don't Know/Comment	Yes	Yes	Yes	Yes	No	No		14	3	YES
Examining multimorbidity differences across racial groups: a network analysis of electronic medical records.	2020	Kalgotra, Pankush; Sharda, Ramesh; Croff, Julie M.	10.1038/s41598-020-70470-8	No	Yes	Yes	Yes	Yes	Yes	Don't Know/Comment	Yes	Yes	Yes	Yes	Yes	Don't Know/Comment	Don't Know/Comment	Yes	Yes	Yes	Yes	Don't Know/Comment	No		14	2	YES
Factors Associated With Multimorbidity Patterns in Older Adults in England: Findings From the English Longitudinal Study of Aging (ELSA).	2020	Nguyen, Hai; Chua, Kia-Chong; Dregan, Alexandru; Vitoratou, Silia; Bayes-Marin, Ivet; Olaya, Beatriz; Prina, A. Matthew	10.1177/0898264319891026	Yes	Yes	Yes	Yes	Yes	Yes	Don't Know/Comment	Yes	Yes	Yes	Yes	Yes	Don't Know/Comment	Don't Know/Comment	Yes	Yes	Yes	Yes	No	Yes		16	1	YES
General practitioners records are epidemiological predictors of comorbidities: An analytical cross-sectional 10-year retrospective study	2018	Cavallo, P., Pagano, S., De Santis, M., Capobianco, E.	10.3390/jcm7080184	Yes	Yes	Yes	Yes	Yes	Yes	Don't Know/Comment	Yes	Yes	Yes	Yes	Yes	Don't Know/Comment	Don't Know/Comment	Yes	Yes	Yes	Yes	No	Yes		16	1	YES
Global Multimorbidity Patterns: A Cross-Sectional, Population-Based, Multi-Country Study.	2016	Garin, Noe; Koyanagi, Ai; Chatterji, Somnath; Tyrovolas, Stefanos; Olaya, Beatriz; Leonardi, Matilde; Lara, Elvira; Koskinen, Seppo; Tobiasz-Adamczyk, Beata; Ayuso-Mateos, Jose Luis; Haro, Josep Maria	10.1093/gerona/glv128	Yes	Yes	Yes	Yes	Yes	Yes	Don't Know/Comment	Yes	Yes	Yes	Yes	Yes	Don't Know/Comment	Don't Know/Comment	Yes	Yes	Yes	Yes	No	Yes		16	1	YES
Identifying co-occurrence and clustering of chronic diseases using latent class analysis: cross-sectional findings from SAGE South Africa Wave 2.	2021	Chidumwa, Glory; Maposa, Innocent; Corso, Barbara; Minicuci, Nadia; Kowal, Paul; Micklesfield, Lisa K.; Ware, Lisa Jayne	10.1136/bmjopen-2020-041604	Yes	Yes	Yes	Yes	Yes	Yes	Don't Know/Comment	Yes	Yes	Yes	Yes	Yes	Don't Know/Comment	Don't Know/Comment	Yes	Yes	Yes	Yes	No	Yes		16	1	YES
Identifying longitudinal clusters of multimorbidity in an urban setting: A population-based cross-sectional study	2021	Bisquera, A., Gulliford, M., Dodhia, H., Ledwaba-Chapman, L., Durbaba, S., Soley-Bori, M., Fox-Rushby, J., Ashworth, M., Wang, Y.	10.1016/j.lanepe.2021.100047	Yes	Yes	Yes	Yes	Yes	Yes	Don't Know/Comment	Yes	Yes	Yes	Yes	Yes	Don't Know/Comment	Don't Know/Comment	Yes	Yes	Yes	Yes	No	Yes		16	1	YES
Identifying multimorbidity patterns of non-communicable diseases in paediatric inpatients: a cross-sectional study in Shanghai, China	2021	Chen N, Zhou L, Huang J, Yu W, Chen C, Jin H, Shi X, Yu Z, Liu Q, Yang Y, Wang Z, Shi J.	10.1136/bmjopen-2020-042679	Yes	Yes	Yes	Yes	Yes	Yes	Don't Know/Comment	Yes	Yes	Yes	Yes	Yes	Don't Know/Comment	Don't Know/Comment	Yes	Yes	Yes	Yes	No	Yes		16	1	YES
Identifying Patterns of Multimorbidity in Older Americans: Application of Latent Class Analysis	2016	Whitson HE, Johnson KS, Sloane R, Cigolle CT, Pieper CF, Landerman L, Hastings SN.	10.1111/jgs.14201	Yes	Yes	Yes	Yes	Yes	Yes	Don't Know/Comment	Yes	Yes	Yes	Yes	Yes	Don't Know/Comment	Don't Know/Comment	Yes	Yes	Yes	Yes	No	Yes		16	1	YES
Inequalities in multimorbidity among elderly: a population-based study in a city in Southern Brazil.	2018	Costa, Caroline Dos Santos; Flores, Thaynã Ramos; Wendt, Andrea; Neves, Rosália Garcia; Tomasi, Elaine; Cesar, Juraci A.; Bertoldi, Andrea Dâmaso; Ramires, Virgílio Viana; Nunes, Bruno Pereira	10.1590/0102-311X00040718	Yes	Yes	Yes	Yes	Yes	Yes	Don't Know/Comment	Yes	Yes	Yes	Yes	Yes	Don't Know/Comment	Don't Know/Comment	Yes	Yes	Yes	Yes	No	Yes		16	1	YES
Latent class analysis of multimorbidity patterns and associated outcomes in Spanish older adults: a prospective cohort study.	2017	Olaya, Beatriz; Moneta, Maria Victoria; Caballero, Francisco Félix; Tyrovolas, Stefanos; Bayes, Ivet; Ayuso-Mateos, José Luis; Haro, Josep Maria	10.1186/s12877-017-0586-1	Yes	Yes	Yes	Yes	Yes	Yes	Don't Know/Comment	Yes	Yes	Yes	Yes	Yes	Don't Know/Comment	Don't Know/Comment	Yes	Yes	Yes	Yes	No	Yes		16	1	YES
Learning multimorbidity patterns from electronic health records using Non-negative Matrix Factorisation	2020	Hassaine A, Canoy D, Solares JRA, Zhu Y, Rao S, Li Y, Zottoli M, Rahimi K, Salimi-Khorshidi G.	10.1016/j.jbi.2020.103606	Yes	Yes	Yes	Yes	Yes	Yes	Don't Know/Comment	Yes	Yes	Yes	Yes	Yes	Don't Know/Comment	Don't Know/Comment	Yes	Yes	Yes	No	No	Yes		15	2	YES
Lifestyle and Socioeconomic Determinants of Multimorbidity Patterns among Mid-Aged Women: A Longitudinal Study.	2016	Jackson, Caroline A.; Dobson, Annette J.; Tooth, Leigh R.; Mishra, Gita D.	10.1371/journal.pone.0156804	Yes	Yes	Yes	Yes	Yes	Yes	Don't Know/Comment	Yes	Yes	Yes	Yes	Yes	Don't Know/Comment	Don't Know/Comment	Yes	Yes	Yes	Yes	No	Yes	Funding of The Australian Commonwealth Department of Health	16	1	YES
Multilevel Analysis of the Patterns of Physical-Mental Multimorbidity in General Population of São Paulo Metropolitan Area, Brazil.	2019	Wang, Yuan-Pang; Nunes, Bruno P.; Coêlho, Bruno M.; Santana, Geilson L.; do Nascimento, Carla F.; Viana, Maria Carmen; Benseñor, Isabela M.; Andrade, Laura H.; Chiavegatto Filho, Alexandre D. P.	10.1038/s41598-019-39326-8	Yes	Yes	Yes	Yes	Yes	Yes	Don't Know/Comment	Yes	Yes	Yes	Yes	Yes	Don't Know/Comment	Don't Know/Comment	Yes	Yes	Yes	Yes	Don't Know/Comment	Yes		16	0	YES
Multimorbidity among two million adults in China	2020	Wang, X., Yao, S., Wang, M., Cao, G., Chen, Z., Huang, Z., Wu, Y., Han, L., Xu, B., Hu, Y.	10.3390/ijerph17103395	Yes	Yes	Yes	Yes	Yes	Yes	Don't Know/Comment	Yes	Yes	Yes	Yes	Yes	Don't Know/Comment	Don't Know/Comment	Yes	Yes	Yes	Yes	No	No		15	2	YES
Multimorbidity Analysis of 13 Systemic Diseases in Northeast China	2020	Yu, JX; Song, FY; Li, YY; Zheng, Z; Jia, HH; Sun, YZ; Jin, LN; Yu, XH	10.3390/ijerph17061817	Yes	Yes	Yes	Yes	Yes	Yes	Don't Know/Comment	Yes	Yes	Yes	Yes	Yes	Don't Know/Comment	Don't Know/Comment	Yes	Yes	Yes	Yes	No	Yes		16	1	YES
Multimorbidity and functional status in older people: a cluster analysis	2020	Machón M, Mateo-Abad M, Clerencia-Sierra M, Güell C, Poblador-Pou B, Vrotsou K, Gimeno-Miguel A, Prados-Torres A, Vergara I.	10.1007/s41999-020-00291-5	Yes	Yes	Yes	Yes	No	Yes	Don't Know/Comment	Yes	Yes	Yes	Yes	Yes	Don't Know/Comment	Don't Know/Comment	Yes	Yes	Yes	Yes	No	Yes		15	2	YES
Multimorbidity and health-related quality of life (HRQoL) in a nationally representative population sample: implications of count versus cluster method for defining multimorbidity on HRQoL	2017	Wang L, Palmer AJ, Cocker F, Sanderson K.	10.1186/s12955-016-0580-x	Yes	Yes	Yes	Yes	Yes	Yes	Don't Know/Comment	Yes	Yes	Yes	Yes	Yes	Don't Know/Comment	Don't Know/Comment	Yes	Yes	Yes	Yes	No	Yes		16	1	YES
Multimorbidity and Hospital Admissions in High-Need, High-Cost Elderly Patients	2020	Buja, Alessandra; Rivera, Michele; De Battisti, Elisa; Corti, Maria Chiara; Avossa, Francesco; Schievano, Elena; Rigon, Stefano; Baldo, Vincenzo; Boccuzzo, Giovanna; Ebell, Mark H.	10.1177/0898264318817091	Yes	Yes	Yes	Yes	Yes	Yes	Don't Know/Comment	Yes	Yes	Yes	Yes	Yes	Don't Know/Comment	Don't Know/Comment	Yes	Yes	Yes	Yes	No	Yes		16	1	YES
Multimorbidity and Its Patterns according to Immigrant Origin. A Nationwide Register-Based Study in Norway.	2015	Diaz, Esperanza; Poblador-Pou, Beatriz; Gimeno-Feliu, Luis-Andrés; Calderón-Larrañaga, Amaia; Kumar, Bernadette N.; Prados-Torres, Alexandra	10.1371/journal.pone.0145233	Yes	Yes	Yes	Yes	Yes	Yes	Don't Know/Comment	Yes	Yes	Yes	Yes	Don't Know/Comment	Don't Know/Comment	Yes	Yes	Yes	Yes	Yes	No	Yes		16	1	YES
Multimorbidity gender patterns in hospitalized elderly patients	2020	Almagro P, Ponce A, Komal S, de la Asunción Villaverde M, Castrillo C, Grau G, Simon L, de la Sierra A.	10.1371/journal.pone.0227252	Yes	Yes	Yes	Yes	Yes	Yes	Don't Know/Comment	Yes	Yes	Yes	Yes	Yes	Don't Know/Comment	Don't Know/Comment	Yes	Yes	Yes	Yes	No	Yes		16	1	YES
Multimorbidity in the community-dwelling elderly in urban China	2017	Gu J, Chao J, Chen W, Xu H, Wu Z, Chen H, He T, Deng L, Zhang R.	10.1016/j.archger.2016.09.001	Yes	Yes	Yes	Yes	Yes	Yes	Don't Know/Comment	Yes	Yes	Yes	Yes	Yes	Don't Know/Comment	Don't Know/Comment	Yes	Yes	Yes	Yes	No	Yes		16	1	YES
Multimorbidity Patterns and 6-Year Risk of Institutionalization in Older Persons: The Role of Social Formal and Informal Care	2021	Marengoni, A., Tazzeo, C., Calderón-Larrañaga, A., Roso-Llorach, A., Onder, G., Zucchelli, A., Rizzuto, D., Vetrano, D.L.	10.1016/j.jamda.2020.12.040	Yes	Yes	Yes	Yes	Yes	Yes	Don't Know/Comment	Yes	Yes	Yes	Yes	Yes	No	Don't Know/Comment	Yes	Yes	Yes	Yes	No	Yes		16	2	YES
Multimorbidity Patterns and Memory Trajectories in Older Adults: Evidence From the English Longitudinal Study of Aging	2021	Bendayan R, Zhu Y, Federman AD, Dobson RJB.	10.1093/gerona/glab009	Yes	Yes	Yes	Yes	Yes	Yes	Yes	Yes	Yes	Yes	Yes	Yes	Don't Know/Comment	Don't Know/Comment	Yes	Yes	Yes	Yes	Yes	Yes		18	0	YES
Multimorbidity patterns and risk of frailty in older community-dwelling adults: a population-based cohort study	2021	Tazzeo C, Rizzuto D, Calderón-Larrañaga A, Roso-Llorach A, Marengoni A, Welmer AK, Onder G, Trevisan C, Vetrano DL.	10.1093/ageing/afab138	Yes	Yes	Yes	Yes	Yes	Yes	Don't Know/Comment	Yes	Yes	Yes	Yes	Yes	Don't Know/Comment	Don't Know/Comment	Yes	Yes	Yes	Yes	No	Yes		16	1	YES
Multimorbidity patterns and their related characteristics in European older adults: A longitudinal perspective.	2021	Zacarías-Pons, Lluís; Vilalta-Franch, Joan; Turró-Garriga, Oriol; Saez, Marc; Garre-Olmo, Josep	10.1016/j.archger.2021.104428	Yes	Yes	Yes	Yes	Yes	Yes	Don't Know/Comment	Yes	Yes	Yes	Yes	Yes	Don't Know/Comment	Don't Know/Comment	Yes	Yes	Yes	Yes	No	Yes		16	1	YES
Multimorbidity patterns and their relationship to mortality in the US older adult population	2021	Zheng DD, Loewenstein DA, Christ SL, Feaster DJ, Lam BL, McCollister KE, Curiel-Cid RE, Lee DJ.	10.1371/journal.pone.0245053	Yes	Yes	Yes	Yes	Yes	Yes	Don't Know/Comment	Yes	Yes	Yes	Yes	Yes	Don't Know/Comment	Don't Know/Comment	Yes	Yes	Yes	Yes	No	Yes		16	1	YES
Multimorbidity Patterns in Elderly Primary Health Care Patients in a South Mediterranean European Region: A Cluster Analysis	2015	Foguet-Boreu, Quinti; Violan, Concepcion; Rodriguez-Blanco, Teresa; Roso-Llorach, Albert; Pons-Vigues, Mariona; Pujol-Ribera, Enriqueta; Cossio Gil, Yolima; Valderas, Jose M.	10.1371/journal.pone.0141155	Yes	Yes	Yes	Yes	Yes	Yes	Don't Know/Comment	Yes	Yes	Yes	Yes	Yes	Don't Know/Comment	Don't Know/Comment	Yes	Yes	Yes	Yes	No	Yes		16	1	YES
Multimorbidity patterns in low-middle and high income regions: a multiregion latent class analysis using ATHLOS harmonised cohorts.	2020	Bayes-Marin, Ivet; Sanchez-Niubo, Albert; Egea-Cortés, Laia; Nguyen, Hai; Prina, Matthew; Fernández, Daniel; Haro, Josep Maria; Olaya, Beatriz	10.1136/bmjopen-2019-034441	Yes	Yes	Yes	Yes	Yes	Yes	Don't Know/Comment	Yes	Yes	Yes	Yes	Yes	Don't Know/Comment	Don't Know/Comment	Yes	Yes	Yes	Yes	No	Yes		16	1	YES
Multimorbidity patterns in old adults and their associated multi-layered factors: a cross-sectional study	2021	Lu, Jiao; Wang, Yuan; Hou, Lihong; Zuo, Zhenxing; Zhang, Na; Wei, Anle	10.1186/s12877-021-02292-w	Yes	Yes	Yes	Yes	Yes	Yes	Don't Know/Comment	Yes	Yes	Yes	Yes	Yes	Don't Know/Comment	Don't Know/Comment	Yes	Yes	Yes	Yes	No	Yes		16	1	YES
Multimorbidity patterns in primary care: interactions among chronic diseases using factor analysis	2012	Prados-Torres A, Poblador-Plou B, Calderón-Larrañaga A, Gimeno-Feliu LA, González-Rubio F, Poncel-Falcó A, Sicras-Mainar A, Alcalá-Nalvaiz JT.	10.1371/journal.pone.0032190	Yes	Yes	Yes	Yes	Yes	Yes	Don't Know/Comment	Yes	Yes	Yes	Yes	Yes	Don't Know/Comment	Don't Know/Comment	Yes	Yes	Yes	Yes	No	Yes		16	1	YES
Multimorbidity patterns in the elderly: a prospective cohort study with cluster analysis	2018	Guisado-Clavero M, Roso-Llorach A, López-Jimenez T, Pons-Vigués M, Foguet-Boreu Q, Muñoz MA, Violán C.	10.1186/s12877-018-0705-7	Yes	Yes	Yes	Yes	Yes	Yes	Don't Know/Comment	Yes	Yes	Yes	Yes	Yes	Don't Know/Comment	Don't Know/Comment	Yes	Yes	Yes	Yes	No	Yes		16	1	YES
Multimorbidity Patterns in the General Population: Results from the EpiChron Cohort Study	2020	Ioakeim-Skoufa I, Poblador-Plou B, Carmona-Pírez J, Díez-Manglano J, Navickas R, Gimeno-Feliu LA, González-Rubio F, Jureviciene E, Dambrauskas L, Prados-Torres A, Gimeno-Miguel A.	10.3390/ijerph17124242	Yes	Yes	Yes	Yes	Yes	Yes	Don't Know/Comment	Yes	Yes	Yes	Yes	Yes	Don't Know/Comment	Don't Know/Comment	Yes	Yes	Yes	Yes	No	Yes		16	1	YES
Multimorbidity patterns of chronic conditions and geriatric syndromes in older patients from the MoPIM multicentre cohort study	2021	Baré M, Herranz S, Roso-Llorach A, Jordana R, Violán C, Lleal M, Roura-Poch P, Arellano M, Estrada R, Nazco GJ; MoPIM study group.	10.1136/bmjopen-2021-049334	Yes	Yes	Yes	Yes	Yes	Yes	Don't Know/Comment	Yes	Yes	Yes	Yes	Yes	Don't Know/Comment	Don't Know/Comment	Yes	Yes	Yes	Yes	No	Yes		16	1	YES
Multimorbidity patterns with K-means nonhierarchical cluster analysis	2018	Violán C, Roso-Llorach A, Foguet-Boreu Q, Guisado-Clavero M, Pons-Vigués M, Pujol-Ribera E, Valderas JM.	10.1186/s12875-018-0790-x	Yes	Yes	Yes	Yes	Yes	Yes	Don't Know/Comment	Yes	Yes	Yes	Yes	Yes	Don't Know/Comment	Don't Know/Comment	Yes	Yes	Yes	Yes	No	Yes		16	1	YES
Multimorbidity patterns, all-cause mortality and healthy aging in older English adults: Results from the English Longitudinal Study of Aging	2020	Nguyen H, Wu YT, Dregan A, Vitoratou S, Chua KC, Prina AM.	10.1111/ggi.14051	Yes	Yes	Yes	Yes	Yes	Yes	Don't Know/Comment	Yes	Yes	No	No	Yes	Don't Know/Comment	Don't Know/Comment	Yes	Yes	Yes	Yes	No	Yes		14	3	YES
Multimorbidity Patterns, Frailty, and Survival in Community-Dwelling Older Adults	2019	Nguyen QD, Wu C, Odden MC, Kim DH.	10.1093/gerona/gly205	Yes	Yes	Yes	Yes	Yes	Yes	Don't Know/Comment	Yes	Yes	Yes	Yes	Yes	Don't Know/Comment	Don't Know/Comment	Yes	Yes	Yes	Yes	No	Yes		16	1	YES
Multiple Chronic Conditions and Hospitalizations Among Recipients of Long-Term Services and Supports	2016	Van Cleave, Janet H.; Egleston, Brian L.; Abbott, Katherine M.; Hirschman, Karen B.; Rao, Aditi; Naylor, Mary D.	10.1097/NNR.0000000000000185	Yes	Yes	Yes	Yes	Yes	Yes	Yes	Yes	Yes	Yes	Yes	Yes	Yes	Don't Know/Comment	Yes	Yes	Yes	Yes	No	Yes		18	1	YES
Multiple chronic conditions: Implications for cognition - Findings from the Wisconsin Registry for Alzheimer's Prevention (WRAP)	2018	Bratzke LC, Carlson BA, Moon C, Brown RL, Koscik RL, Johnson SC.	10.1016/j.apnr.2018.06.004	Yes	Yes	Yes	Yes	Yes	Yes	Don't Know/Comment	Yes	Yes	Yes	Yes	Yes	Don't Know/Comment	Don't Know/Comment	Yes	Yes	Yes	Yes	No	No		15	2	YES
Patrones de multimorbilidad en adultos jóvenes en Cataluna: un análisis de clústeres	2016	Violán C, Foguet-Boreu Q, Roso-Llorach A, Rodriguez-Blanco T, Pons-Vigués M, Pujol-Ribera E, Valderas JM.	10.1016/j.aprim.2015.10.006	Yes	Yes	Yes	Yes	Yes	Yes	Don't Know/Comment	Yes	Yes	Yes	Yes	Yes	Don't Know/Comment	Don't Know/Comment	Yes	Yes	Yes	Yes	No	Yes		16	1	YES
Patterns and Consequences of Multimorbidity in the General Population: There is No Chronic Disease Management Without Rheumatic Disease Management	2017	Simões D, Araújo FA, Severo M, Monjardino T, Cruz I, Carmona L, Lucas R.	10.1002/acr.22996	Yes	Yes	Yes	Yes	Yes	Yes	Yes	Yes	Yes	Yes	Yes	Yes	No	Don't Know/Comment	Yes	Yes	Yes	Yes	No	No		16	3	YES
Patterns of Chronic Conditions and Their Associations With Behaviors and Quality of Life, 2010	2015	Barile JP, Mitchell SA, Thompson WW, Zack MM, Reeve BB, Cella D, Smith AW.	10.5888/pcd12.150179	Yes	Yes	Yes	Yes	Yes	Yes	No	Yes	Yes	Yes	Yes	Yes	No	Don't Know/Comment	Yes	Yes	Yes	Yes	No	Yes		16	3	YES
Patterns of chronic physical multimorbidity in psychiatric and general population	2018	Filipčić I, Šimunović Filipčić I, Grošić V, Bakija I, Šago D, Benjak T, Uglešić B, Bajić Ž, Sartorius N.	10.1016/j.jpsychores.2018.09.011	Yes	Yes	Yes	Yes	Yes	Yes	Don't Know/Comment	Yes	Yes	Yes	Yes	Yes	Don't Know/Comment	Don't Know/Comment	Yes	Yes	Yes	Yes	No	Yes		16	1	YES
Patterns of multimorbidity and demographic profile of latent classes in a Danish population-A register-based study.	2020	Møller, Sanne Pagh; Laursen, Bjarne; Johannesen, Caroline Klint; Tolstrup, Janne S.; Schramm, Stine	10.1371/journal.pone.0237375	Yes	Yes	Yes	Yes	Yes	Don't Know/Comment	Don't Know/Comment	Yes	Yes	Yes	Yes	Yes	Don't Know/Comment	Don't Know/Comment	Yes	Yes	Yes	Yes	No	Yes		15	1	YES
Patterns of multi-morbidity and prediction of hospitalisation and all-cause mortality in advanced age	2018	Teh, Ruth O.; Menzies, Oliver H.; Connolly, Martin J.; Doughty, Rob N.; Wilkinson, Tim J.; Pillai, Avinesh; Lumley, Thomas; Ryan, Cristin; Rolleston, Anna; Broad, Joanna B.; Kerse, Ngaire	10.1093/ageing/afx184	Yes	Yes	Yes	Yes	Yes	Yes	No	Yes	Yes	Yes	No	Yes	No	Yes	Yes	Yes	Yes	Yes	No	Yes		16	4	YES
Patterns of multimorbidity in 4588 older adults: Implications for a nongeriatrician specialist	2021	Piotrowicz, K., Pac, A., Skalska, A., Mossakowska, M., Chudek, J., Zdrojewski, T., Wiecek, A., Grodzicki, T., Gasowski, J.	10.20452/pamw.16128	Yes	Yes	Yes	Yes	Yes	Yes	Yes	Yes	Yes	Yes	Yes	Yes	No	Yes	Yes	Yes	Yes	Yes	No	Yes		18	2	YES
Patterns of Multimorbidity in a Population-Based Cohort of Older People: Sociodemographic, Lifestyle, Clinical, and Functional Differences.	2020	Marengoni, Alessandra; Roso-Llorach, Albert; Vetrano, Davide L.; Fernández-Bertolín, Sergio; Guisado-Clavero, Marina; Violán, Concepción; Calderón-Larrañaga, Amaia	10.1093/gerona/glz137	Yes	Yes	Yes	Yes	Yes	Don't Know/Comment	Don't Know/Comment	Yes	Yes	Yes	Yes	Yes	Don't Know/Comment	Don't Know/Comment	Yes	Yes	Yes	Yes	No	Yes		15	1	YES
Patterns of Multimorbidity in Adults: An Association Rules Analysis Using the Korea Health Panel	2020	Lee Y, Kim H, Jeong H, Noh Y.	10.3390/ijerph17082618	Yes	Yes	Yes	Yes	Yes	Yes	No	Yes	Yes	Yes	Yes	Yes	No	Don't Know/Comment	Yes	Yes	Yes	Yes	No	Yes		16	3	YES
Patterns of multimorbidity in the aged population. Results from the KORA-Age study	2012	Kirchberger I, Meisinger C, Heier M, Zimmermann AK, Thorand B, Autenrieth CS, Peters A, Ladwig KH, Döring A.	10.1371/journal.pone.0030556	Yes	Yes	Yes	Yes	Yes	Yes	Yes	Yes	Yes	Yes	No	Yes	No	Don't Know/Comment	Yes	Yes	Yes	Yes	No	Yes		16	3	YES
Patterns of patients with multiple chronic conditions in primary care: A cross-sectional study	2020	Tan XW, Xie Y, Lew JK, Lee PSS, Lee ES.	10.1371/journal.pone.0238353	Yes	Yes	Yes	Yes	Yes	Don't Know/Comment	Don't Know/Comment	Yes	Yes	Yes	Yes	Yes	No	Don't Know/Comment	Yes	Yes	Yes	Yes	No	Yes		15	2	YES
Physical multimorbidity, depressive symptoms, and social participation in adults over 50 years of age: findings from the English Longitudinal Study of Ageing	2021	Ronaldson, A., Arias de la Torre, J., Bendayan, R., Yadegarfar, M.E., Rhead, R., Douiri, A., Armstrong, D., Hatch, S., Hotopf, M., Dregan, A.	10.1080/13607863.2021.2017847	Yes	Yes	Yes	Yes	Yes	Don't Know/Comment	Don't Know/Comment	Yes	Yes	Yes	Yes	Yes	No	Don't Know/Comment	Yes	Yes	Yes	Yes	No	Yes		15	2	YES
Prevalence and Patterns of Multimorbidity in a Nationally Representative Sample of Older Chinese: Results From the China Health and Retirement Longitudinal Study.	2020	Yao, Shan-Shan; Cao, Gui-Ying; Han, Ling; Chen, Zi-Shuo; Huang, Zi-Ting; Gong, Ping; Hu, Yonghua; Xu, Beibei	10.1093/gerona/glz185	Yes	Yes	Yes	Yes	Yes	Yes	Yes	Yes	Yes	Yes	Yes	Yes	No	Yes	Yes	Yes	Yes	Yes	No	Yes		18	2	YES
Prevalence and patterns of multimorbidity in Australian baby boomers: the Busselton healthy ageing study	2021	Hunter ML, Knuiman MW, Musk BAW, Hui J, Murray K, Beilby JP, Hillman DR, Hung J, Newton RU, Bucks RS, Straker L, Walsh JP, Zhu K, Bruce DG, Eikelboom RH, Davis TME, Mackey DA, James AL.	10.1186/s12889-021-11578-y	Yes	Yes	Yes	Yes	Yes	Yes	No	Yes	Yes	Yes	Yes	Yes	No	Don't Know/Comment	Yes	Yes	Yes	Yes	No	Yes		16	3	YES
Prevalence and Patterns of Multi-Morbidity in Serbian Adults: A Cross-Sectional Study	2016	Jovic D, Vukovic D, Marinkovic J.	10.1371/journal.pone.0148646	Yes	Yes	Yes	Yes	Yes	Yes	Don't Know/Comment	Yes	Yes	Yes	Yes	Yes	Don't Know/Comment	Don't Know/Comment	Yes	Yes	Yes	Yes	No	Yes		16	1	YES
Prevalence of multimorbidity in general practice: a cross-sectional study within the Swiss Sentinel Surveillance System (Sentinella)	2018	Excoffier S, Herzig L, N'Goran AA, Déruaz-Luyet A, Haller DM.	10.1136/bmjopen-2017-019616	Yes	Yes	Yes	Yes	Yes	Yes	Don't Know/Comment	Yes	Yes	Yes	Yes	Yes	Don't Know/Comment	Don't Know/Comment	Yes	Yes	Yes	Yes	No	Yes		16	1	YES
Similar multimorbidity patterns in primary care patients from two European regions: results of a factor analysis	2014	Poblador-Plou B, van den Akker M, Vos R, Calderón-Larrañaga A, Metsemakers J, Prados-Torres A.	10.1371/journal.pone.0100375	Yes	Yes	Yes	Yes	Yes	Yes	Don't Know/Comment	Yes	Yes	Yes	Yes	Yes	Don't Know/Comment	Don't Know/Comment	Yes	Yes	Yes	Yes	No	Yes		16	1	YES
Social Determinants and Health Behaviours among Older Adults Experiencing Multimorbidity Using the Canadian Longitudinal Study on Aging	2021	Wister, A.	10.1017/S0714980821000544	Yes	Yes	Yes	Yes	Yes	Yes	Don't Know/Comment	Yes	Yes	Yes	Yes	Yes	Don't Know/Comment	Don't Know/Comment	Yes	Yes	Yes	Yes	No	Yes		16	1	YES
Social determinants of multimorbidity in Jamaica: application of latent class analysis in a cross-sectional study.	2021	Craig, Leslie S.; Cunningham-Myrie, Colette A.; Hotchkiss, David R.; Hernandez, Julie H.; Gustat, Jeanette; Theall, Katherine P.	10.1186/s12889-021-11225-6	Yes	Yes	Yes	Yes	Yes	Yes	Don't Know/Comment	Yes	Yes	Yes	Yes	Yes	Don't Know/Comment	Don't Know/Comment	Yes	Yes	Yes	Yes	No	Yes		16	1	YES
Soft clustering using real-world data for the identification of multimorbidity patterns in an elderly population: cross-sectional study in a Mediterranean population.	2019	Violán, Concepción; Foguet-Boreu, Quintí; Fernández-Bertolín, Sergio; Guisado-Clavero, Marina; Cabrera-Bean, Margarita; Formiga, Francesc; Valderas, Jose Maria; Roso-Llorach, Albert	10.1136/bmjopen-2019-029594	Yes	Yes	Yes	Yes	Yes	Yes	Don't Know/Comment	Yes	Yes	Yes	Yes	Yes	Don't Know/Comment	Don't Know/Comment	Yes	Yes	Yes	Yes	No	Yes		16	1	YES
Spreading of diseases through comorbidity networks across life and gender	2014	Chmiel, A., Klimek, P., Thurner, S.	10.1088/1367-2630/16/11/115013	No	Yes	Yes	Yes	Yes	Yes	Don't Know/Comment	Yes	Yes	Yes	Yes	Yes	Don't Know/Comment	Don't Know/Comment	Yes	Yes	Yes	Yes	No	Yes		15	2	YES
Survival in relation to multimorbidity patterns in older adults in primary care in Barcelona, Spain (2010-2014): a longitudinal study based on electronic health records	2018	Ibarra-Castillo C, Guisado-Clavero M, Violan-Fors C, Pons-Vigués M, López-Jiménez T, Roso-Llorach A; Collaborators.	10.1136/jech-2017-209984	Yes	Yes	Yes	Yes	Yes	Yes	Don't Know/Comment	Yes	Yes	Yes	Yes	Yes	Don't Know/Comment	Don't Know/Comment	Yes	Yes	Yes	Yes	No	Yes		16	1	YES
The burden of cardiovascular morbidity in a European Mediterranean population with multimorbidity: a cross-sectional study	2016	Violán C, Bejarano-Rivera N, Foguet-Boreu Q, Roso Llorach A, Pons-Vigués M, Martin Mateo M, Pujol-Ribera E.	10.1186/s12875-016-0546-4	Yes	Yes	Yes	Yes	Yes	Yes	Don't Know/Comment	Yes	Yes	Yes	Yes	Yes	Don't Know/Comment	Don't Know/Comment	Yes	Yes	Yes	Yes	No	Yes		16	1	YES
The epidemiology of multimorbidity in primary care: a retrospective cohort study.	2018	Cassell, Anna; Edwards, Duncan; Harshfield, Amelia; Rhodes, Kirsty; Brimicombe, James; Payne, Rupert; Griffin, Simon	10.3399/bjgp18X695465	Yes	Yes	Yes	Yes	Yes	Yes	Don't Know/Comment	Yes	Yes	Yes	Yes	Yes	Don't Know/Comment	Don't Know/Comment	Yes	Yes	Yes	Yes	No	Yes		16	1	YES
The influence of age, gender and socio-economic status on multimorbidity patterns in primary care. First results from the multicare cohort study.	2012	Schäfer, Ingmar; Hansen, Heike; Schön, Gerhard; Höfels, Susanne; Altiner, Attila; Dahlhaus, Anne; Gensichen, Jochen; Riedel-Heller, Steffi; Weyerer, Siegfried; Blank, Wolfgang A.; König, Hans-Helmut; von dem Knesebeck, Olaf; Wegscheider, Karl; Scherer, Martin; van den Bussche, Hendrik; Wiese, Birgitt	10.1186/1472-6963-12-89	Yes	Yes	Yes	Yes	Yes	Yes	Yes	Yes	Yes	Yes	Yes	Yes	No	Yes	Yes	Yes	Yes	No	No	Yes		17	3	YES
The modeling of internalizing disorders on the basis of patterns of lifetime comorbidity: associations with psychosocial functioning and psychiatric disorders among first-degree relatives	2011	Seeley JR, Kosty DB, Farmer RF, Lewinsohn PM.	10.1037/a0022621	Yes	Yes	Yes	Yes	Yes	Yes	Don't Know/Comment	Yes	Yes	Yes	Yes	Yes	Don't Know/Comment	Don't Know/Comment	Yes	Yes	Yes	No	No	No		14	3	YES
The patterns of Non-communicable disease Multimorbidity in Iran: A Multilevel Analysis	2020	Khorrami Z, Rezapour M, Etemad K, Yarahmadi S, Khodakarim S, Mahdavi Hezaveh A, Kameli M, Khanjani N.	10.1038/s41598-020-59668-y	Yes	Yes	Yes	Yes	Yes	Yes	Don't Know/Comment	Yes	Yes	Yes	Yes	Yes	Don't Know/Comment	Don't Know/Comment	Yes	Yes	Yes	Yes	No	Yes		16	1	YES
Trends of multimorbidity in 15 European countries: a population-based study in community-dwelling adults aged 50 and over	2021	Souza DLB, Oliveras-Fabregas A, Minobes-Molina E, de Camargo Cancela M, Galbany-Estragués P, Jerez-Roig J.	10.1186/s12889-020-10084-x	Yes	Yes	Yes	Yes	Yes	Yes	Don't Know/Comment	Yes	Yes	Yes	Yes	Yes	Don't Know/Comment	Don't Know/Comment	Yes	Yes	Yes	Yes	No	Yes		16	1	YES
Use of latent class analysis to identify multimorbidity patterns and associated factors in Korean adults aged 50 years and older.	2019	Park, Bomi; Lee, Hye Ah; Park, Hyesook	10.1371/journal.pone.0216259	Yes	Yes	Yes	Yes	Yes	Yes	Don't Know/Comment	Yes	Yes	Yes	Yes	Yes	Don't Know/Comment	Don't Know/Comment	Yes	Yes	Yes	Yes	No	Yes		16	1	YES
Using item response theory with health system data to identify latent groups of patients with multiple health conditions	2018	Prenovost, Katherine M.; Fihn, Stephan D.; Maciejewski, Matthew L.; Nelson, Karin; Vijan, Sandeep; Rosland, Ann-Marie	10.1371/journal.pone.0206915	Yes	Yes	Yes	Yes	Yes	Yes	Don't Know/Comment	Yes	Yes	Yes	Yes	Yes	Don't Know/Comment	Don't Know/Comment	Yes	Yes	Yes	Yes	No	Yes		16	1	YES
Latent classes of posttraumatic psychiatric comorbidity in the general population	2021	Anthony J. Rosellini, Péter Szentkúti, Erzsébet Horváth-Puhó, Meghan L. Smith, Isaac Galatzer-Levy, Timothy L. Lash, Sandro Galea, Paula P. Schnurr, Henrik T. Sorensen, and Jaimie L. Gradusb,	10.1016/j.jpsychires.2021.02.013	Yes	Yes	Yes	Yes	Yes	Yes	Don't Know/Comment	Yes	Yes	Yes	Yes	Yes	Don't Know/Comment	Don't Know/Comment	Yes	Yes	Yes	Yes	No	Yes		16	1	YES
